# Supplementary material for: On-resin N-methylation of cyclic peptides for discovery of orally bioavailable scaffolds
Source: Springer Nature journal article supplement (doi:10.1038/nchembio.664), 2011-09-25
Supplement: 41589_2011_BFnchembio664_MOESM1_ESM.mol [file 41589_2011_BFnchembio664_MOESM1_ESM.mol]

  ChemDraw09121111252D

 51 53  0  0  0  0  0  0  0  0999 V2000
   -2.2313   -0.4697    0.0000 O   0  0  0  0  0  0  0  0  0  0  0  0
   -2.2313   -1.2947    0.0000 C   0  0  0  0  0  0  0  0  0  0  0  0
   -1.5168   -1.7072    0.0000 C   0  0  0  0  0  0  0  0  0  0  0  0
   -2.9457   -1.7072    0.0000 N   0  0  0  0  0  0  0  0  0  0  0  0
   -3.6387   -1.4666    0.0000 C   0  0  0  0  0  0  0  0  0  0  0  0
   -3.6387   -0.6416    0.0000 C   0  0  0  0  0  0  0  0  0  0  0  0
   -2.8418   -0.4281    0.0000 O   0  0  0  0  0  0  0  0  0  0  0  0
   -4.0727    0.2759    0.0000 N   0  0  0  0  0  0  0  0  0  0  0  0
   -3.6602    0.9593    0.0000 C   0  0  0  0  0  0  0  0  0  0  0  0
   -2.9457    1.3718    0.0000 C   0  0  0  0  0  0  0  0  0  0  0  0
   -3.0530    2.1869    0.0000 O   0  0  0  0  0  0  0  0  0  0  0  0
   -4.3087   -1.9432    0.0000 C   0  0  0  0  0  0  0  0  0  0  0  0
   -4.2310   -2.7617    0.0000 C   0  0  0  0  0  0  0  0  0  0  0  0
   -4.9009   -3.2383    0.0000 C   0  0  0  0  0  0  0  0  0  0  0  0
   -3.4832   -3.1037    0.0000 C   0  0  0  0  0  0  0  0  0  0  0  0
   -4.3291    1.4374    0.0000 C   0  0  0  0  0  0  0  0  0  0  0  0
   -4.3928    2.2572    0.0000 C   0  0  0  0  0  0  0  0  0  0  0  0
   -5.1380    2.6047    0.0000 C   0  0  0  0  0  0  0  0  0  0  0  0
   -3.7147    2.7222    0.0000 C   0  0  0  0  0  0  0  0  0  0  0  0
   -2.1488    1.1582    0.0000 N   0  0  0  0  0  0  0  0  0  0  0  0
   -1.4344    1.5707    0.0000 C   0  0  0  0  0  0  0  0  0  0  0  0
   -0.7199    1.1582    0.0000 C   0  0  0  0  0  0  0  0  0  0  0  0
   -0.9334    0.3613    0.0000 O   0  0  0  0  0  0  0  0  0  0  0  0
   -0.1751    1.5681    0.0000 N   0  0  0  0  0  0  0  0  0  0  0  0
   -0.1751    2.3900    0.0000 C   0  0  0  0  0  0  0  0  0  0  0  0
    0.5986    2.6536    0.0000 C   0  0  0  0  0  0  0  0  0  0  0  0
    1.0900    1.9945    0.0000 C   0  0  0  0  0  0  0  0  0  0  0  0
    0.6148    1.3232    0.0000 C   0  0  0  0  0  0  0  0  0  0  0  0
    0.6148    0.4982    0.0000 C   0  0  0  0  0  0  0  0  0  0  0  0
   -0.1821    0.2846    0.0000 O   0  0  0  0  0  0  0  0  0  0  0  0
    1.0273   -0.2163    0.0000 N   0  0  0  0  0  0  0  0  0  0  0  0
    0.8138   -1.0132    0.0000 C   0  0  0  0  0  0  0  0  0  0  0  0
    0.2304   -1.5966    0.0000 C   0  0  0  0  0  0  0  0  0  0  0  0
    0.4432   -2.3908    0.0000 O   0  0  0  0  0  0  0  0  0  0  0  0
   -0.5665   -1.3830    0.0000 N   0  0  0  0  0  0  0  0  0  0  0  0
    1.7395   -1.5477    0.0000 C   0  0  0  0  0  0  0  0  0  0  0  0
    2.6756   -1.5182    0.0000 C   0  0  0  0  0  0  0  0  0  0  0  0
    3.0882   -2.2328    0.0000 C   0  0  0  0  0  0  0  0  0  0  0  0
    3.9174   -2.2328    0.0000 C   0  0  0  0  0  0  0  0  0  0  0  0
    4.3379   -1.5044    0.0000 C   0  0  0  0  0  0  0  0  0  0  0  0
    3.9145   -0.7710    0.0000 C   0  0  0  0  0  0  0  0  0  0  0  0
    3.0650   -0.7710    0.0000 C   0  0  0  0  0  0  0  0  0  0  0  0
    5.1380   -1.5044    0.0000 O   0  0  0  0  0  0  0  0  0  0  0  0
   -1.5968   -2.5255    0.0000 C   0  0  0  0  0  0  0  0  0  0  0  0
   -0.9281   -3.0039    0.0000 C   0  0  0  0  0  0  0  0  0  0  0  0
   -1.0081   -3.8223    0.0000 C   0  0  0  0  0  0  0  0  0  0  0  0
   -0.1794   -2.6641    0.0000 C   0  0  0  0  0  0  0  0  0  0  0  0
   -1.4344    2.3957    0.0000 C   0  0  0  0  0  0  0  0  0  0  0  0
   -1.0219    3.1102    0.0000 C   0  0  0  0  0  0  0  0  0  0  0  0
   -1.4330    3.8223    0.0000 C   0  0  0  0  0  0  0  0  0  0  0  0
   -0.1996    3.1102    0.0000 C   0  0  0  0  0  0  0  0  0  0  0  0
  1  2  2  0      
  2  3  1  0      
  2  4  1  0      
  4  5  1  0      
  5  6  1  0      
  6  7  2  0      
  6  8  1  0      
  8  9  1  0      
  9 10  1  0      
 10 11  2  0      
  5 12  1  6      
 12 13  1  0      
 13 14  1  0      
 13 15  1  0      
  9 16  1  1      
 16 17  1  0      
 17 18  1  0      
 17 19  1  0      
 10 20  1  0      
 20 21  1  0      
 21 22  1  0      
 22 23  2  0      
 22 24  1  0      
 24 25  1  0      
 25 26  1  0      
 26 27  1  0      
 24 28  1  0      
 28 27  1  6      
 28 29  1  0      
 29 30  2  0      
 29 31  1  0      
 31 32  1  0      
 32 33  1  0      
 33 34  2  0      
 33 35  1  0      
 35  3  1  0      
 32 36  1  1      
 36 37  1  0      
 37 38  2  0      
 38 39  1  0      
 39 40  2  0      
 40 41  1  0      
 41 42  2  0      
 42 37  1  0      
 40 43  1  0      
  3 44  1  1      
 44 45  1  0      
 45 46  1  0      
 45 47  1  0      
 21 48  1  1      
 48 49  1  0      
 49 50  1  0      
 49 51  1  0      
M  END
