# Supplementary material for: On-resin N-methylation of cyclic peptides for discovery of orally bioavailable scaffolds
Source: Springer Nature journal article supplement (doi:10.1038/nchembio.664), 2011-09-25
Supplement: 41589_2011_BFnchembio664_MOESM5_ESM.mol [file 41589_2011_BFnchembio664_MOESM5_ESM.mol]

  ChemDraw09121111252D

 56 58  0  0  0  0  0  0  0  0999 V2000
   -2.2313   -0.4697    0.0000 O   0  0  0  0  0  0  0  0  0  0  0  0
   -2.2313   -1.2947    0.0000 C   0  0  0  0  0  0  0  0  0  0  0  0
   -1.5168   -1.7072    0.0000 C   0  0  0  0  0  0  0  0  0  0  0  0
   -2.9457   -1.7072    0.0000 N   0  0  0  0  0  0  0  0  0  0  0  0
   -2.9457   -2.5322    0.0000 C   0  0  0  0  0  0  0  0  0  0  0  0
   -3.6387   -1.4666    0.0000 C   0  0  0  0  0  0  0  0  0  0  0  0
   -3.6387   -0.6416    0.0000 C   0  0  0  0  0  0  0  0  0  0  0  0
   -2.8418   -0.4281    0.0000 O   0  0  0  0  0  0  0  0  0  0  0  0
   -4.0727    0.2759    0.0000 N   0  0  0  0  0  0  0  0  0  0  0  0
   -3.6602    0.9593    0.0000 C   0  0  0  0  0  0  0  0  0  0  0  0
   -2.9457    1.3718    0.0000 C   0  0  0  0  0  0  0  0  0  0  0  0
   -3.0530    2.1869    0.0000 O   0  0  0  0  0  0  0  0  0  0  0  0
   -4.3087   -1.9432    0.0000 C   0  0  0  0  0  0  0  0  0  0  0  0
   -4.2310   -2.7617    0.0000 C   0  0  0  0  0  0  0  0  0  0  0  0
   -4.9009   -3.2383    0.0000 C   0  0  0  0  0  0  0  0  0  0  0  0
   -3.4832   -3.1037    0.0000 C   0  0  0  0  0  0  0  0  0  0  0  0
   -4.8977    0.2759    0.0000 C   0  0  0  0  0  0  0  0  0  0  0  0
   -4.3291    1.4374    0.0000 C   0  0  0  0  0  0  0  0  0  0  0  0
   -4.3928    2.2572    0.0000 C   0  0  0  0  0  0  0  0  0  0  0  0
   -5.1380    2.6046    0.0000 C   0  0  0  0  0  0  0  0  0  0  0  0
   -3.7147    2.7222    0.0000 C   0  0  0  0  0  0  0  0  0  0  0  0
   -2.1488    1.1582    0.0000 N   0  0  0  0  0  0  0  0  0  0  0  0
   -1.4344    1.5707    0.0000 C   0  0  0  0  0  0  0  0  0  0  0  0
   -2.1488    0.3332    0.0000 H   0  0  0  0  0  0  0  0  0  0  0  0
   -0.7199    1.1582    0.0000 C   0  0  0  0  0  0  0  0  0  0  0  0
   -0.9334    0.3613    0.0000 O   0  0  0  0  0  0  0  0  0  0  0  0
   -0.1751    1.5681    0.0000 N   0  0  0  0  0  0  0  0  0  0  0  0
   -0.1751    2.3900    0.0000 C   0  0  0  0  0  0  0  0  0  0  0  0
    0.5986    2.6536    0.0000 C   0  0  0  0  0  0  0  0  0  0  0  0
    1.0900    1.9945    0.0000 C   0  0  0  0  0  0  0  0  0  0  0  0
    0.6148    1.3232    0.0000 C   0  0  0  0  0  0  0  0  0  0  0  0
    0.6148    0.4982    0.0000 C   0  0  0  0  0  0  0  0  0  0  0  0
   -0.1821    0.2846    0.0000 O   0  0  0  0  0  0  0  0  0  0  0  0
    1.0273   -0.2163    0.0000 N   0  0  0  0  0  0  0  0  0  0  0  0
    0.8138   -1.0132    0.0000 C   0  0  0  0  0  0  0  0  0  0  0  0
    1.8242   -0.0028    0.0000 C   0  0  0  0  0  0  0  0  0  0  0  0
    0.2304   -1.5966    0.0000 C   0  0  0  0  0  0  0  0  0  0  0  0
    0.4432   -2.3908    0.0000 O   0  0  0  0  0  0  0  0  0  0  0  0
   -0.5665   -1.3830    0.0000 N   0  0  0  0  0  0  0  0  0  0  0  0
   -0.7800   -0.5862    0.0000 H   0  0  0  0  0  0  0  0  0  0  0  0
    1.7394   -1.5477    0.0000 C   0  0  0  0  0  0  0  0  0  0  0  0
    2.6756   -1.5182    0.0000 C   0  0  0  0  0  0  0  0  0  0  0  0
    3.0882   -2.2328    0.0000 C   0  0  0  0  0  0  0  0  0  0  0  0
    3.9174   -2.2328    0.0000 C   0  0  0  0  0  0  0  0  0  0  0  0
    4.3379   -1.5044    0.0000 C   0  0  0  0  0  0  0  0  0  0  0  0
    3.9145   -0.7710    0.0000 C   0  0  0  0  0  0  0  0  0  0  0  0
    3.0650   -0.7710    0.0000 C   0  0  0  0  0  0  0  0  0  0  0  0
    5.1380   -1.5044    0.0000 O   0  0  0  0  0  0  0  0  0  0  0  0
   -1.5968   -2.5255    0.0000 C   0  0  0  0  0  0  0  0  0  0  0  0
   -0.9281   -3.0039    0.0000 C   0  0  0  0  0  0  0  0  0  0  0  0
   -1.0081   -3.8223    0.0000 C   0  0  0  0  0  0  0  0  0  0  0  0
   -0.1794   -2.6641    0.0000 C   0  0  0  0  0  0  0  0  0  0  0  0
   -1.4344    2.3957    0.0000 C   0  0  0  0  0  0  0  0  0  0  0  0
   -1.0219    3.1102    0.0000 C   0  0  0  0  0  0  0  0  0  0  0  0
   -1.4330    3.8223    0.0000 C   0  0  0  0  0  0  0  0  0  0  0  0
   -0.1996    3.1102    0.0000 C   0  0  0  0  0  0  0  0  0  0  0  0
  1  2  2  0      
  2  3  1  0      
  2  4  1  0      
  4  5  1  0      
  4  6  1  0      
  6  7  1  0      
  7  8  2  0      
  7  9  1  0      
  9 10  1  0      
 10 11  1  0      
 11 12  2  0      
  6 13  1  6      
 13 14  1  0      
 14 15  1  0      
 14 16  1  0      
  9 17  1  0      
 10 18  1  1      
 18 19  1  0      
 19 20  1  0      
 19 21  1  0      
 11 22  1  0      
 22 23  1  0      
 22 24  1  0      
 23 25  1  0      
 25 26  2  0      
 25 27  1  0      
 27 28  1  0      
 28 29  1  0      
 29 30  1  0      
 27 31  1  0      
 31 30  1  6      
 31 32  1  0      
 32 33  2  0      
 32 34  1  0      
 34 35  1  0      
 34 36  1  0      
 35 37  1  0      
 37 38  2  0      
 37 39  1  0      
 39  3  1  0      
 39 40  1  0      
 35 41  1  1      
 41 42  1  0      
 42 43  2  0      
 43 44  1  0      
 44 45  2  0      
 45 46  1  0      
 46 47  2  0      
 47 42  1  0      
 45 48  1  0      
  3 49  1  1      
 49 50  1  0      
 50 51  1  0      
 50 52  1  0      
 23 53  1  1      
 53 54  1  0      
 54 55  1  0      
 54 56  1  0      
M  END
